# Supplementary material for: Molecular evolution and diversification of the GRF transcription factor family
Source: PubMed Central journal article supplement (PMC7380329; doi:10.1590/1678-4685-gmb-2020-0080), 2020-07-24
Supplement: 1415-4757-GMB-43-3-e20200080-suppl1.pdf [file 1415-4757-GMB-43-3-e20200080-suppl1.pdf]

## Supplementary Material to “Molecular evolution and diversification of the GRF transcription factor family”

**Table S1** – Species, loci and taxa terminologies of SNF2-type genes used in the tree.

|                                    | Organism                                 | Genome version                   | Loci                                                                            | Names used in the tree                                                  |                                 |
|------------------------------------|------------------------------------------|----------------------------------|---------------------------------------------------------------------------------|-------------------------------------------------------------------------|---------------------------------|
| <b>Fungi</b>                       | <i>Allomyces macrogynus</i> ATCC 38327   | GCA_000151295.1                  | AMAG12941;<br>AMAG20005                                                         | Ama_12941;<br>Ama_20005                                                 |                                 |
|                                    | <i>Aspergillus nidulans</i> FGSC A4      | ASM14920v1                       | XM_654790                                                                       | Ani_XM654790                                                            |                                 |
|                                    | <i>Dichomitus squalens</i> LYAD-421 SSI  | GCA_000275845.1                  | XM_007364686;<br>XM_007368367                                                   | Dsq_XM007364686;<br>Dsq_XM007368367                                     |                                 |
|                                    | <i>Erethothecium gossypii</i> ATCC 10895 | ASM9102v4                        | NM_212245                                                                       | Ego_NM212245                                                            |                                 |
|                                    | <i>Pneumocystis carinii</i> B80          | GCA_001477545.1                  | XM_018369289                                                                    | Pca_XM018369289                                                         |                                 |
|                                    | <i>Penicillium digitatum</i> Pdl         | GCA_000315645.2                  | XM_014678523                                                                    | Pdi_XM014678523                                                         |                                 |
|                                    | <i>Saccharomyces cerevisiae</i> S288C    | GCA_000146045.2                  | NM_001183709                                                                    | Sce_NM001183709                                                         |                                 |
|                                    | <i>Ustilago maydis</i> 521               | GCA_000328475.2                  | XM_011389107                                                                    | Uma_XM011389107                                                         |                                 |
|                                    | <i>Cryptococcus gattii</i> WM276         | GCA_000185945.1                  | XM_0031965851                                                                   | Cga_XM0031965851                                                        |                                 |
|                                    | <b>Algae</b>                             | <i>Chlamydomonas reinhardtii</i> | v5.5                                                                            | CRE07.G325700                                                           | Cre_07G325700                   |
| <i>Micromonas</i> sp. RCC299       |                                          | v3.0                             | EUGENE.0200010520;<br>EUGENE.0600010227                                         | Msp_0200010520;<br>Msp_0600010227                                       |                                 |
| <i>Micromonas pusilla</i> CCMP1545 |                                          | v3                               | MICPUC2.EUGENE.00000<br>90245                                                   | Mpu_0000090245                                                          |                                 |
| <i>Volvox carteri</i>              |                                          | v2.1                             | VOCAR.0021S0108                                                                 | Vca_0021S0108                                                           |                                 |
| <i>Klebsormidium nitens</i>        |                                          | v1.1                             | kfl00148_0270                                                                   | Kfl_001480270                                                           |                                 |
| <b>Land Plants</b>                 | <i>Arabidopsis thaliana</i>              | TAIR10                           | AT2G28290 (SYD);<br>AT2G46020 (BRM)                                             | Ath_AT2G28290;<br>Ath_AT2G46020                                         |                                 |
|                                    | <i>Brachypodium distachyon</i>           | v3.1                             | BRADI1G4417<br>7;<br>BRADI3G0129<br>7                                           | Bdi_1G44177;<br>Bdi_3G01297                                             |                                 |
|                                    | <i>Brassica rapa</i>                     | FPsc v1.3                        | BRARA.C0231<br>6;<br>BRARA.D0278<br>1                                           | Bra_C02316;<br>Bra_D02781                                               |                                 |
|                                    | <i>Oryza sativa</i>                      | v7_JGI                           | LOC_Os02g02290                                                                  | Osa_Os02g02290                                                          |                                 |
|                                    | <i>Physcomitrella patens</i>             | v3.3                             | Pp3c13_14440;<br>Pp3c14_90;<br>Pp3c3_15820                                      | Ppa_3c1314440;<br>Ppa_3c1490;<br>Ppa_3c315820                           |                                 |
|                                    | <i>Populus trichocarpa</i>               | v3.1                             | POTRI.002G160900;<br>POTRI.008G195900;<br>POTRI.010G019400;<br>POTRI.014G086500 | Ptr_002G160900;<br>Ptr_008G195900;<br>Ptr_010G019400;<br>Ptr_014G086500 |                                 |
|                                    | <i>Sphagnum fallax</i>                   | v0.5                             | SPHFALX0029S0063;<br>SPHFALX0058S0094                                           | Sfa_0029s0063;<br>Sfa_0058s0094                                         |                                 |
|                                    | <i>Caenorhabditis elegans</i>            | Metazome v3                      | WBGENE00004204                                                                  | Cel_00004204                                                            |                                 |
|                                    | <b>Metazoans</b>                         | <i>Canis familiaris</i>          | Metazome v3                                                                     | LOC476335;<br>LOC476710                                                 | Cfa_LOC476335;<br>Cfa_LOC476710 |

| <b>Organism</b>                      | <b>Genome version</b> | <b>Loci</b>                                                       | <b>Names used in the tree</b>                            |
|--------------------------------------|-----------------------|-------------------------------------------------------------------|----------------------------------------------------------|
| <i>Danio rerio</i>                   | <i>Metazome v3</i>    | ENSDARG00000004314;<br>ENSDARG00000008904;<br>ENSDARG000000046105 | Dre_00000004314;<br>Dre_00000008904;<br>Dre_000000046105 |
| <i>Gallus gallus</i>                 | <i>Metazome v3</i>    | ENSGALG00000010164                                                | Gga_00000010164                                          |
| <i>Homo sapiens</i>                  | <i>Metazome v3</i>    | ENSG000000080503;<br>ENSG00000127616                              | Hsa_000000080503;<br>Hsa_00000127616                     |
| <i>Monodelphis domestica</i>         | <i>Metazome v3</i>    | ENSMODG00000003578;<br>ENSMODG00000006287                         | Mdo_00000003578;<br>Mdo_00000006287                      |
| <i>Nematostella vectensis</i>        | <i>Metazome v3</i>    | 178940                                                            | Nve_178940                                               |
| <i>Rattus norvegicus</i>             | <i>Metazome v3</i>    | ENSRNOG00000009271;<br>ENSRNOG00000011931                         | Rno_00000009271;<br>Rno_00000011931                      |
| <i>Strongylocentrotus purpuratus</i> | <i>Metazome v3</i>    | LOC589355; LOC756605                                              | Stp_LOC589355;<br>Stp_LOC756605                          |
| <i>Tribolium castaneum</i>           | <i>Metazome v3</i>    | LOC655742                                                         | Trc_LOC655742                                            |
| <i>Xenopus tropicalis</i>            | <i>Metazome v3</i>    | 461216; 470898                                                    | Xtr_461216;<br>Xtr_470898                                |
