# Supplementary material for: Molecular evolution and diversification of the GRF transcription factor family
Source: PubMed Central journal article supplement (PMC7380329; doi:10.1590/1678-4685-gmb-2020-0080), 2020-07-24
Supplement: 1415-4757-GMB-43-3-e20200080-suppl2.pdf [file 1415-4757-GMB-43-3-e20200080-suppl2.pdf]

## Supplementary Material to “Molecular evolution and diversification of the GRF transcription factor family”

**Table S2** - Species, *loci* and taxa terminologies of GRF genes used in the trees

| Organism and genome version            | GRFs | <i>Loci</i>                                                                                                                                                                                                                                   | Names used on trees                                                                                                                                                                                           |
|----------------------------------------|------|-----------------------------------------------------------------------------------------------------------------------------------------------------------------------------------------------------------------------------------------------|---------------------------------------------------------------------------------------------------------------------------------------------------------------------------------------------------------------|
| <i>Aquilegia coerulea</i><br>v3.1      | 7    | Acqoe1G454000 ; Acqoe2G129900;<br>Acqoe3G214400; Acqoe5G457000 ;<br>Acqoe6G259800; Acqoe7G060800;<br>Acqoe7G112900                                                                                                                            | Aco_1G454000; Aco_2G129900;<br>Aco_3G214400; Aco_5G457000;<br>Aco_6G259800; Aco_7G060800;<br>Aco_7G112900                                                                                                     |
| <i>Arabidopsis lyrata</i><br>v2.1      | 9    | AL3G26150; AL3G43750; AL4G12420;<br>AL4G32560; AL4G44650; AL5G33700;<br>AL7G12940; AL7G29140; AL8G28610                                                                                                                                       | Aly_3G26150; Aly_3G43750; Aly_4G12420;<br>Aly_4G32560; Aly_4G44650; Aly_5G33700;<br>Aly_7G12940; Aly_7G29140; Aly_8G28610                                                                                     |
| <i>Arabidopsis thaliana</i><br>TAIR10  | 9    | AT2G06200; AT2G22840; AT2G36400;<br>AT2G45480; AT3G13960; AT3G52910;<br>AT4G24150; AT4G37740; AT5G53660                                                                                                                                       | Ath_AT2G06200; Ath_AT2G22840;<br>Ath_AT2G36400; Ath_AT2G45480;<br>Ath_AT3G13960; Ath_AT3G52910;<br>Ath_AT4G24150; Ath_AT4G37740;<br>Ath_AT5G53660                                                             |
| <i>Azolla Filiculoides</i><br>v1.1     | 3    | Azfi_s0256.g060519; Azfi_s0001.g000094;<br>Azfi_s0097.g043820†                                                                                                                                                                                | Azf_s0256g060519; Azf_s0001g000094                                                                                                                                                                            |
| <i>Boechera stricta</i><br>v1.2        | 8    | Bostr.23794s0452; Bostr.24399s0028;<br>Bostr.25993s0227; Bostr.26833s0909;<br>Bostr.28625s0309; Bostr.7867s0220;<br>Bostr.7867s1635; Bostr.19427s0054                                                                                         | Bos_23794s0452; Bos_24399s0028;<br>Bos_25993s0227; Bos_26833s0909;<br>Bos_28625s0309; Bos_7867s0220;<br>Bos_7867s1635; Bos_9427s0054                                                                          |
| <i>Brachypodium distachyon</i><br>v3.1 | 12   | Bradi1g09900; Bradi1g12650; Bradi1g28400;<br>Bradi1g46427; Bradi1g50597; Bradi2g14320;<br>Bradi3g51685; Bradi3g52547; Bradi3g57267;<br>Bradi4g16450; Bradi5g18961; Bradi5g20607                                                               | Bdi_1g09900; Bdi_1g12650; Bdi_1g28400;<br>Bdi_1g46427; Bdi_1g50597; Bdi_2g14320;<br>Bdi_3g51685; Bdi_3g52547; Bdi_3g57267;<br>Bdi_4g16450; Bdi_5g18961 ; Bdi_5g20607                                          |
| <i>Brachypodium stacei</i><br>v1.1     | 12   | Brast02G260100; Brast02G292700;<br>Brast04G093600; Brast04G039200;<br>Brast04G104800; Brast06G139500;<br>Brast07G020400; Brast07G067500;<br>Brast08G002800; Brast09G178600;<br>Brast09G195300; Brast10G125600                                 | Bst_02G260100; Bst_02G292700;<br>Bst_04G0936000; Bst_04G039200;<br>Bst_04G104800; Bst_06G139500;<br>Bst_07G020400; Bst_07G067500;<br>Bst_08G002800; Bst_09G178600;<br>Bst_09G195300; Bst_10G125600            |
| <i>Brassica rapa</i><br>FPsc v1.3      | 16   | Brara.A00122; Brara.A01418; Brara.A03222;<br>Brara.B01438; Brara.C01828; Brara.C02492;<br>Brara.C03502; Brara.D02218; Brara.D02744;<br>Brara.E00841; Brara.E02725; Brara.G00464;<br>Brara.G01562; Brara.I03590; Brara.K00742;<br>Brara.K01237 | Bra_A00122; Bra_A01418; Bra_A03222;<br>Bra_B01438; Bra_C01828; Bra_C02492;<br>Bra_C03502; Bra_D02218; Bra_D02744;<br>Bra_E00841; Bra_E02725; Bra_G00464;<br>Bra_G01562; Bra_I03590; Bra_K00742;<br>Bra_K01237 |
| <i>Capsella grandiflora</i><br>v1.1    | 8    | Cagra.0228s0030; Cagra.0612s0011;<br>Cagra.0736s0034; Cagra.0757s0005;<br>Cagra.2460s0032; Cagra.4290s0006;<br>Cagra.9757s0010; Cagra.1226s0080                                                                                               | Cgr_0228s0030; Cgr_0612s0011;<br>Cgr_0736s0034; Cgr_0757s0005;<br>Cgr_2460s0032; Cgr_4290s0006;<br>Cgr_9757s0010; Cgr_1226s0080                                                                               |
| <i>Capsella rubella</i><br>v1.0        | 8    | Carubv10004544m.g; Carubv10007298m.g;<br>Carubv10013860m.g; Carubv10015887m.g;<br>Carubv10017366m.g; Carubv10022975m.g;<br>Carubv10025172m.g; Carubv10026610m.g                                                                               | Cru_10004544; Cru_10007298;<br>Cru_10013860; Cru_10015887;<br>Cru_10017366; Cru_10022975;<br>Cru_10025172; Cru_10026610                                                                                       |
| <i>Citrus clementina</i><br>v1.0       | 9    | Ciclev10001613m.g; Ciclev10008922m.g;<br>Ciclev10011856m.g; Ciclev10019529m.g;<br>Ciclev10019828m.g; Ciclev10022033m.g;<br>Ciclev10025209m.g; Ciclev10025855m.g;<br>Ciclev10032065m.g Acqoe7G060800                                           | Ccl_10001613; Ccl_10008922;<br>Ccl_10011856; Ccl_10019529;<br>Ccl_10019828; Ccl_10022033;<br>Ccl_10025209; Ccl_10025855;<br>Ccl_10032065Aco_7G060800                                                          |
| <i>Citrus sinensis</i><br>v1.1         | 9    | orange1.1g007514m.g; orange1.1g009918m.g;<br>orange1.1g010979m.g; orange1.1g018208m.g;<br>orange1.1g020051m.g; orange1.1g023105m.g;<br>orange1.1g028751m.g; orange1.1g047108m.g;<br>orange1.1g040599m.g†                                      | Csi_g007514m;<br>Csi_g009918m;<br>Csi_g010979m;<br>Csi_g018208m;<br>Csi_g020051m;<br>Csi_g023105m;<br>Csi_g028751m;<br>Csi_g047108m;<br>Csi_g040599m†                                                         |

| Organism and genome version                              | GRFs | Loci                                                                                                                                                                                                                                                                                                                                                                                                               | Names used on trees                                                                                                                                                                                                                                                                                                                                                |
|----------------------------------------------------------|------|--------------------------------------------------------------------------------------------------------------------------------------------------------------------------------------------------------------------------------------------------------------------------------------------------------------------------------------------------------------------------------------------------------------------|--------------------------------------------------------------------------------------------------------------------------------------------------------------------------------------------------------------------------------------------------------------------------------------------------------------------------------------------------------------------|
|                                                          |      |                                                                                                                                                                                                                                                                                                                                                                                                                    | Csi_g023105m;<br>Csi_g028751m;<br>Csi_g047108m;                                                                                                                                                                                                                                                                                                                    |
| <i>Closterium peracerosum-strigosum-littorale</i> (ESTs) | 1    | n.a.                                                                                                                                                                                                                                                                                                                                                                                                               | Clo_01                                                                                                                                                                                                                                                                                                                                                             |
| <i>Cucumis sativus</i> v1.0                              | 8    | Cucsa.017410; Cucsa.257800; Cucsa.378420; Cucsa.395430; Cucsa.103390; Cucsa.117300; Cucsa.141640; Cucsa.192190                                                                                                                                                                                                                                                                                                     | Csa_017410; Csa_257800; Csa_378420; Csa_395430; Csa_103390; Csa_117300; Csa_141640; Csa_192190                                                                                                                                                                                                                                                                     |
| <i>Eucalyptus grandis</i> v2.0                           | 5    | Eucgr.A01418; Eucgr.A01534; Eucgr.C00823; Eucgr.F00097; Eucgr.F04420                                                                                                                                                                                                                                                                                                                                               | Egr_A01418; Egr_A01534; Egr_C00823; Egr_F00097; Egr_F04420                                                                                                                                                                                                                                                                                                         |
| <i>Eutrema salsugineum</i> v1.0                          | 9    | Thhalv10000124m.g; Thhalv10001460m.g; Thhalv10002643m.g; Thhalv10010453m.g; Thhalv10013862m.g; Thhalv10016778m.g; Thhalv10020873m.g; Thhalv10024915m.g; Thhalv10025371m.g                                                                                                                                                                                                                                          | Esa_10000124; Esa_10001460; Esa_10002643; Esa_10010453; Esa_10013862; Esa_10016778; Esa_10020873; Esa_10024915; Esa_10025371                                                                                                                                                                                                                                       |
| <i>Fragaria vesca</i> v1.1                               | 10   | gene01886v1.0hybrid; gene02620v1.0hybrid; gene05636v1.0hybrid; gene07429v1.0hybrid; gene12474v1.0hybrid; gene12549v1.0hybrid; gene12741v1.0hybrid; gene13517v1.0hybrid; gene19384v1.0hybrid; gene30232v1.0hybrid                                                                                                                                                                                                   | Fve_01886; Fve_02620; Fve_05636; Fve_07429; Fve_12474; Fve_12549; Fve_12741; Fve_13517; Fve_19384; Fve_30232                                                                                                                                                                                                                                                       |
| <i>Glycine max</i> Wm82.a2.v1                            | 24   | Glyma.01G148600; Glyma.01G234400; Glyma.03G192200; Glyma.04G230600; Glyma.06G134600; Glyma.07G038400; Glyma.09G068700; Glyma.09G212500; Glyma.U028600; Glyma.U028700; Glyma.10G067200; Glyma.11G008500; Glyma.11G110700; Glyma.11G208800; Glyma.12G014700; Glyma.13G109500; Glyma.15G176500; Glyma.16G007600; Glyma.17G050200; Glyma.17G232600; Glyma.17G232700; Glyma.03G021900; Glyma.01G144900; Glyma.19G192700 | Gma_01G148600; Gma_01G234400; Gma_03G192200; Gma_04G230600; Gma_06G134600; Gma_07G038400; Gma_09G068700; Gma_09G212500; Gma_U028600; Gma_U028700; Gma_10G067200; Gma_11G008500; Gma_11G110700; Gma_11G208800; Gma_12G014700; Gma_13G109500; Gma_15G176500; Gma_16G007600; Gma_17G050200; Gma_17G232600; Gma_17G232700; Gma_03G021900; Gma_01G144900; Gma_19G192700 |
| <i>Gossypium raimondii</i> v2.1                          | 18   | Gorai.003G032300; Gorai.003G057700; Gorai.004G204600; Gorai.005G098700; Gorai.006G157300; Gorai.007G092400; Gorai.008G241800; Gorai.008G259500; Gorai.008G265600; Gorai.009G035200; Gorai.009G222200; Gorai.009G277500; Gorai.009G406500; Gorai.010G027700; Gorai.011G058800; Gorai.011G108400; Gorai.013G184200; Gorai.013G225300                                                                                 | Gra_003G032300; Gra_003G057700; Gra_004G204600; Gra_005G098700; Gra_006G157300; Gra_007G092400; Gra_008G241800; Gra_008G259500; Gra_008G265600; Gra_009G035200; Gra_009G222200; Gra_009G277500; Gra_009G406500; Gra_010G027700; Gra_011G058800; Gra_011G108400; Gra_013G184200; Gra_013G225300                                                                     |
| <i>Klebsormidium crenulatum</i> (ESTs)                   | 1    | n.a.                                                                                                                                                                                                                                                                                                                                                                                                               | Klc_01                                                                                                                                                                                                                                                                                                                                                             |
| <i>Klebsormidium nitens</i> v1.1                         | 1    | kfl00186_0090                                                                                                                                                                                                                                                                                                                                                                                                      | Kfl_001860090                                                                                                                                                                                                                                                                                                                                                      |
| <i>Manihot esculenta</i> v6.1                            | 15   | Manes.01G041800; Manes.01G070800; Manes.01G264700; Manes.02G031200; Manes.03G039500; Manes.04G144700; Manes.05G043700; Manes.05G183900; Manes.08G022300; Manes.08G160800; Manes.09G059500; Manes.11G020200; Manes.12G117600; Manes.16G096400; Manes.18G049600                                                                                                                                                      | Mes_01G041800; Mes_01G070800; Mes_01G264700; Mes_02G031200; Mes_03G039500; Mes_04G144700; Mes_05G043700; Mes_05G183900; Mes_08G022300; Mes_08G160800; Mes_09G059500; Mes_11G020200; Mes_12G117600; Mes_16G096400; Mes_18G049600                                                                                                                                    |
| <i>Medicago truncatula</i> Mt4.0v1                       | 9    | Medtr0001s0490; Medtr1g017490; Medtr2g041430; Medtr3g092330; Medtr4g125490; Medtr5g027030; Medtr7g104050; Medtr8g020560; Medtr8g035910                                                                                                                                                                                                                                                                             | Mtr_0001s0490; Mtr_1g017490; Mtr_2g041430; Mtr_3g092330; Mtr_4g125490; Mtr_5g027030; Mtr_7g104050; Mtr_8g020560; Mtr_8g035910                                                                                                                                                                                                                                      |
| <i>Mesostigma viride</i> (ESTs)                          | 1    | n.a.                                                                                                                                                                                                                                                                                                                                                                                                               | Mes_01                                                                                                                                                                                                                                                                                                                                                             |
| <i>Nitella mirabilis</i> (ESTs)                          | 1    | n.a.                                                                                                                                                                                                                                                                                                                                                                                                               | Nit_01                                                                                                                                                                                                                                                                                                                                                             |
| <i>Oryza sativa</i> v7_JGI                               | 12   | LOC_Os02g45570; LOC_Os02g47280; LOC_Os02g53690; LOC_Os03g47140; LOC_Os03g51970; LOC_Os04g48510;                                                                                                                                                                                                                                                                                                                    | Osa_Os02g45570; Osa_Os02g47280; Osa_Os02g53690; Osa_Os03g47140; Osa_Os03g51970; Osa_Os04g48510 ;                                                                                                                                                                                                                                                                   |

| Organism and genome version          | GRFs | Loci                                                                                                                                                                                                                                                                                                                                                                                                                                                             | Names used on trees                                                                                                                                                                                                                                                                                                                                     |
|--------------------------------------|------|------------------------------------------------------------------------------------------------------------------------------------------------------------------------------------------------------------------------------------------------------------------------------------------------------------------------------------------------------------------------------------------------------------------------------------------------------------------|---------------------------------------------------------------------------------------------------------------------------------------------------------------------------------------------------------------------------------------------------------------------------------------------------------------------------------------------------------|
|                                      |      | LOC_Os04g51190; LOC_Os06g02560;<br>LOC_Os06g10310; LOC_Os07g28430;<br>LOC_Os11g35030; LOC_Os12g29980                                                                                                                                                                                                                                                                                                                                                             | Osa_Os04g51190; Osa_Os06g02560 ;<br>Osa_Os06g10310; Osa_Os07g28430;<br>Osa_Os11g35030; Osa_Os12g29980                                                                                                                                                                                                                                                   |
| <i>Panicum hallii</i><br>v2.0        | 10   | Pahal.A02912; Pahal.A03059; Pahal.A03557;<br>Pahal.B03870; Pahal.D02874; Pahal.G02182;<br>Pahal.H01224; Pahal.H02316; Pahal.I01892;<br>Pahal.I02265                                                                                                                                                                                                                                                                                                              | Pha_A02912; Pha_A03059; Pha_A03557;<br>Pha_B03870; Pha_D02874; Pha_G02182;<br>Pha_H01224; Pha_H02316; Pha_I01892;<br>Pha_I02265                                                                                                                                                                                                                         |
| <i>Panicum virgatum</i><br>v1.1      | 19   | Pavir.Aa00789; Pavir.Aa00919;<br>Pavir.Ab02786; Pavir.Ba01449;<br>Pavir.Bb02610; Pavir.Da01847;<br>Pavir.Da02366; Pavir.Db02048†;<br>Pavir.Db02421; Pavir.Ga00724;<br>Pavir.Gb00674; Pavir.Ha01401;<br>Pavir.Hb00712; Pavir.Ia01043; Pavir.J03212;<br>Pavir.J06517; Pavir.J11763; Pavir.J14128;<br>Pavir.J29705                                                                                                                                                  | Pvi_Aa00789; Pvi_Aa00919;<br>Pvi_Ab02786; Pvi_Ba01449;<br>Pvi_Bb02610; Pvi_Da01847;<br>Pvi_Da02366; Pvi_Db02421;<br>Pvi_Ga00724; Pvi_Gb00674;<br>Pvi_Ha01401; Pvi_Hb00712; Pvi_Ia01043;<br>Pvi_J03212; Pvi_J06517; Pvi_J11763;<br>Pvi_J14128;<br>Pvi_J29705                                                                                             |
| <i>Phaseolus vulgaris</i><br>v2.1    | 11   | Phvul.001G031000; Phvul.001G187500;<br>Phvul.002G041800; Phvul.002G131700;<br>Phvul.003G131800; Phvul.007G222300;<br>Phvul.009G047000; Phvul.009G228000;<br>Phvul.010G048400; Phvul.010G130000;<br>Phvul.011G017700                                                                                                                                                                                                                                              | Pvu_001G031000; Pvu_001G187500;<br>Pvu_002G041800; Pvu_002G131700;<br>Pvu_003G131800; Pvu_007G222300;<br>Pvu_009G047000; Pvu_009G228000;<br>Pvu_010G048400; Pvu_010G130000;<br>Pvu_011G017700                                                                                                                                                           |
| <i>Physcomitrella patens</i><br>v3.3 | 2    | Pp3c12_3720; Pp3c17_1780                                                                                                                                                                                                                                                                                                                                                                                                                                         | Ppa_3c123720; Ppa_3c171780                                                                                                                                                                                                                                                                                                                              |
| <i>Picea abies</i><br>v1.0           | 5    | MA_33661g0010; MA_18836g0010;<br>MA_88101g0010; MA_111469g0010;<br>MA_137877p0010                                                                                                                                                                                                                                                                                                                                                                                | Pic_33661g0010; Pic_18836g0010;<br>Pic_88101g0010; Pic_111469g0010;<br>Pic_137877p0010                                                                                                                                                                                                                                                                  |
| <i>Pinus taeda</i><br>v1.0           | 5    | PITA_000074544; PITA_000023549;<br>PITA_000090725; PITA_000014799;<br>PITA_000034605                                                                                                                                                                                                                                                                                                                                                                             | Pin_000074544; Pin_000023549;<br>Pin_000090725; Pin_000014799;<br>Pin_000034605                                                                                                                                                                                                                                                                         |
| <i>Populus trichocarpa</i><br>v3.1   | 19   | Potri.001G082700; Potri.001G114000;<br>Potri.001G132600; Potri.001G169100;<br>Potri.002G115100; Potri.003G065000;<br>Potri.003G100800; Potri.003G118100;<br>Potri.006G115200; Potri.006G143200;<br>Potri.007G007100; Potri.012G022600;<br>Potri.013G077500; Potri.014G007200;<br>Potri.014G012800; Potri.014G071800;<br>Potri.015G006200; Potri.018G065400;<br>Potri.019G042300                                                                                  | Ptr_001G082700; Ptr_001G114000;<br>Ptr_001G132600; Ptr_001G169100;<br>Ptr_002G115100; Ptr_003G065000;<br>Ptr_003G100800; Ptr_003G118100;<br>Ptr_006G115200; Ptr_006G143200;<br>Ptr_007G007100; Ptr_012G022600;<br>Ptr_013G077500; Ptr_014G007200;<br>Ptr_014G012800; Ptr_014G071800;<br>Ptr_015G006200; Ptr_018G065400;<br>Ptr_019G042300               |
| <i>Prunus persica</i><br>v2.1        | 10   | Prupe.2G148100; Prupe.2G317500;<br>Prupe.2G329200; Prupe.3G041800;<br>Prupe.5G021400; Prupe.5G131600;<br>Prupe.6G217000; Prupe.7G115500;<br>Prupe.7G201000; Prupe.1G419000                                                                                                                                                                                                                                                                                       | Ppe_2G148100; Ppe_2G317500;<br>Ppe_2G329200; Ppe_3G041800;<br>Ppe_5G021400; Ppe_5G131600;<br>Ppe_6G217000; Ppe_7G115500;<br>Ppe_7G201000; Ppe_1G419000                                                                                                                                                                                                  |
| <i>Ricinus communis</i><br>v0.1      | 9    | 27496.t000001; 28976.t000005;<br>29700.t000017; 29706.t000013;<br>29739.t000211; 30068.t000078;<br>30170.t000085; 30174.t000307;<br>30190.t000302                                                                                                                                                                                                                                                                                                                | Rco_27496m000094;<br>Rco_28976m000158;<br>Rco_29700m000761;<br>Rco_29706m001283;<br>Rco_29739m003775;<br>Rco_30068m002588;<br>Rco_30170m013673;<br>Rco_30174m008910; Rco_30190m011066                                                                                                                                                                   |
| <i>Salix purpurea</i><br>v1.0        | 21   | SapurV1A.0002s0920; SapurV1A.0004s0240;<br>SapurV1A.0045s0430; SapurV1A.0051s0520;<br>SapurV1A.0059s0450; SapurV1A.0063s0420;<br>SapurV1A.0087s0080; SapurV1A.0094s0370;<br>SapurV1A.0177s0310; SapurV1A.0208s0190;<br>SapurV1A.0235s0230; SapurV1A.0260s0250;<br>SapurV1A.0326s0130; SapurV1A.0532s0070;<br>SapurV1A.0568s0060; SapurV1A.0608s0150;<br>SapurV1A.0611s0190; SapurV1A.0616s0110;<br>SapurV1A.0755s0030; SapurV1A.3102s0020;<br>SapurV1A.3612s0010 | Spu_0002s0920; Spu_0004s0240;<br>Spu_0045s0430; Spu_0051s0520;<br>Spu_0059s0450; Spu_0063s0420;<br>Spu_0087s0080; Spu_0094s0370;<br>Spu_0177s0310; Spu_0208s0190;<br>Spu_0235s0230; Spu_0260s0250;<br>Spu_0326s0130; Spu_0532s0070;<br>Spu_0568s0060; Spu_0608s0150;<br>Spu_0611s0190; Spu_0616s0110;<br>Spu_0755s0030; Spu_3102s0020;<br>Spu_3612s0010 |
| <i>Salvinia Cucullata</i><br>v1.1    | 4    | Sacu_v1.1_s0120.g021398;<br>Sacu_v1.1_s0001.g000754;<br>Sacu_v1.1_s0161.g023900;                                                                                                                                                                                                                                                                                                                                                                                 | Sal_s0120g021398; Sal_s0001g000754;<br>Sal_s0161g023900                                                                                                                                                                                                                                                                                                 |

| Organism and genome version            | GRFs | Loci                                                                                                                                                                                                                                                                 | Names used on trees                                                                                                                                                                                                                  |
|----------------------------------------|------|----------------------------------------------------------------------------------------------------------------------------------------------------------------------------------------------------------------------------------------------------------------------|--------------------------------------------------------------------------------------------------------------------------------------------------------------------------------------------------------------------------------------|
|                                        |      | Sacu_v1.1_s0004.g002301<br>†                                                                                                                                                                                                                                         |                                                                                                                                                                                                                                      |
| <i>Selaginella moellendorffii</i> v1.0 | 4    | 412762; 417311; 420739;<br>442384                                                                                                                                                                                                                                    | Smo_412762; Smo_417311; Smo_420739;<br>Smo_442384                                                                                                                                                                                    |
| <i>Setaria italica</i> v2.2            | 10   | Seita.2G309100; Seita.4G012400;<br>Seita.4G086400; Seita.7G224500;<br>Seita.8G149500; Seita.9G107700;<br>Seita.9G141900; Seita.1G271800;<br>Seita.1G287100; Seita.1G338700                                                                                           | Sit_2G309100; Sit_4G012400;<br>Sit_4G086400; Sit_7G224500;<br>Sit_8G149500; Sit_9G107700;<br>Sit_9G141900; Sit_1G271800;<br>Sit_1G287100; Sit_1G338700                                                                               |
| <i>Solanum lycopersicum</i> iTAG2.4    | 13   | Solyc01g091540.1; Solyc02g092070.2;<br>Solyc03g082430.1; Solyc04g077510.2;<br>Solyc07g041640.2; Solyc08g005430.2;<br>Solyc08g068760.1; Solyc08g075950.1;<br>Solyc08g079800.2; Solyc08g083230.1;<br>Solyc09g009200.1; Solyc10g083510.1;<br>Solyc12g096070.1           | Sly_01g091540; Sly_02g092070;<br>Sly_03g082430; Sly_04g077510;<br>Sly_07g041640; Sly_08g005430;<br>Sly_08g068760; Sly_08g075950;<br>Sly_08g079800; Sly_08g083230;<br>Sly_09g009200; Sly_10g083510;<br>Sly_12g096070                  |
| <i>Solanum tuberosum</i> v4.3          | 9    | PGSC0003DMG400003220;<br>PGSC0003DMG400004942;<br>PGSC0003DMG400012233;<br>PGSC0003DMG400012767;<br>PGSC0003DMG400018491;<br>PGSC0003DMG400021403;<br>PGSC0003DMG400028259;<br>PGSC0003DMG400029384;<br>PGSC0003DMG400030881                                         | Stu_400005813;<br>Stu_400008794;<br>Stu_400021643;<br>Stu_400022619;<br>Stu_400032217;<br>Stu_400037092;<br>Stu_400049127;<br>Stu_400051174;<br>Stu_400053791                                                                        |
| <i>Sphagnum fallax</i> v0.5            | 4    | Sphfalx0018s0181; Sphfalx0019s0149;<br>Sphfalx0126s0017; Sphfalx0221s0016                                                                                                                                                                                            | Sfa_0018s0181; Sfa_0019s0149;<br>Sfa_0126s0017; Sfa_0221s0016                                                                                                                                                                        |
| <i>Spirogira pratensis</i> (ESTs)      | 1    | n.a.                                                                                                                                                                                                                                                                 | Spi_01                                                                                                                                                                                                                               |
| <i>Theobroma cacao</i> v1.1            | 10   | Thecc1EG000838; Thecc1EG005483;<br>Thecc1EG015497; Thecc1EG015625;<br>Thecc1EG016120; Thecc1EG022490;<br>Thecc1EG025561; Thecc1EG029130;<br>Thecc1EG034655; Thecc1EG037550                                                                                           | Tca_000838; Tca_005483;<br>Tca_015497; Tca_015625;<br>Tca_016120; Tca_022490;<br>Tca_025561; Tca_029130;<br>Tca_034655; Tca_037550                                                                                                   |
| <i>Vitis vinifera</i> Genoscope.12X    | 10   | GSVIVG01007165001;<br>GSVIVG01009299001;<br>GSVIVG01015095001;<br>GSVIVG01016762001;<br>GSVIVG01019913001;<br>GSVIVG01024326001;<br>GSVIVG01033800001;<br>GSVIVG01038629001;<br>GSVIVG01019667001;<br>GSVIVG01027535001                                              | Vvi_01007165001; Vvi_01009299001;<br>Vvi_01015095001; Vvi_01016762001;<br>Vvi_01019913001; Vvi_01024326001;<br>Vvi_01033800001; Vvi_01038629001;<br>Vvi_01019667001 (VviGRF9)*;<br>Vvi_01027535001 (VviGRF10)*                       |
| <i>Zea mays</i> Ensembl-18             | 16   | GRMZM2G004619; GRMZM2G018414;<br>GRMZM2G034876; GRMZM2G041223;<br>GRMZM2G045977; GRMZM2G067743;<br>GRMZM2G096709; GRMZM2G098594;<br>GRMZM2G099862; GRMZM2G105335;<br>GRMZM2G124566; GRMZM2G129147;<br>GRMZM2G178261; GRMZM5G850129;<br>GRMZM5G853392; GRMZM5G893117† | Zma_2G004619; Zma_2G018414;<br>Zma_2G034876; Zma_2G041223;<br>Zma_2G045977; Zma_2G067743;<br>ma_2G096709; Zma_2G098594;<br>Zma_2G099862; Zma_2G105335;<br>Zma_2G124566; Zma_2G129147;<br>Zma_2G178261; Zma_5G850129;<br>Zma_5G853392 |

† Genes not used in the trees due to the absence of QLQ or WRC domains.

\*Genes named in this work.
