# Supplementary material for: Molecular evolution and diversification of the GRF transcription factor family
Source: PubMed Central journal article supplement (PMC7380329; doi:10.1590/1678-4685-gmb-2020-0080), 2020-07-24
Supplement: 1415-4757-GMB-43-3-e20200080-suppl3.pdf [file 1415-4757-GMB-43-3-e20200080-suppl3.pdf]

## Supplementary Material to “Molecular evolution and diversification of the GRF transcription factor family”

Table S3 - GRF numbers and *loci* used in the synteny analysis

| GRF n°       | <i>Glycine max</i> <sup>a</sup> | <i>Zea mays</i> <sup>*,b</sup> | <i>Solanum lycopersicum</i> <sup>c</sup> | <i>Brachypodium distachyon</i> <sup>*,d</sup> | <i>Oryza sativa</i> <sup>e</sup> | <i>Arabidopsis thaliana</i> <sup>f</sup> |
|--------------|---------------------------------|--------------------------------|------------------------------------------|-----------------------------------------------|----------------------------------|------------------------------------------|
| <b>GRF1</b>  | Glyma.15G17650<br>0             | GRMZM2G034876                  | Solyc12g096070                           | Bradi1g0990<br>0                              | LOC_Os02g536<br>90               | AT2G22840                                |
| <b>GRF2</b>  | Glyma.09G06870<br>0             | GRMZM2G099862                  | Solyc08g005430                           | Bradi1g1265<br>0                              | LOC_Os06g103<br>10               | AT4G37740                                |
| <b>GRF3</b>  | Glyma.13G10950<br>0             | GRMZM2G105335                  | Solyc08g075950                           | Bradi2g1432<br>0                              | LOC_Os04g511<br>90               | AT2G36400                                |
| <b>GRF4</b>  | Glyma.17G05020<br>0             | GRMZM2G004619                  | Solyc07g041640                           | Bradi4g1645<br>0                              | LOC_Os02g472<br>80               | AT3G52910                                |
| <b>GRF5</b>  | Glyma.17G23270<br>0             | GRMZM2G129147                  | Solyc04g077510                           | Bradi5g2060<br>7                              | LOC_Os06g025<br>60               | AT3G13960                                |
| <b>GRF6</b>  | Glyma.U028700                   | GRMZM2G041223                  | Solyc02g092070                           | Bradi1g2840<br>0                              | LOC_Os03g519<br>70               | AT2G06200                                |
| <b>GRF7</b>  | Glyma.17G23260<br>0             | GRMZM5G850129                  | Solyc08g083230                           | Bradi1g4642<br>7                              | LOC_Os12g299<br>80               | AT5G53660                                |
| <b>GRF8</b>  | Glyma.U028600                   | GRMZM2G033612†                 | Solyc03g082430                           | Bradi1g5059<br>7                              | LOC_Os11g350<br>30               | AT4G24150                                |
| <b>GRF9</b>  | Glyma.04G23060<br>0             | GRMZM5G893117†                 | Solyc08g068760                           | Bradi3g5168<br>5                              | LOC_Os03g471<br>40               | AT2G45480                                |
| <b>GRF10</b> | Glyma.06G13460<br>0             | GRMZM2G096709                  | Solyc01g091540                           | Bradi3g5726<br>7                              | LOC_Os02g455<br>70               |                                          |
| <b>GRF11</b> | Glyma.16G00760<br>0             | GRMZM2G067743                  | Solyc09g009200                           | Bradi3g5254<br>7*                             | LOC_Os07g284<br>30               |                                          |
| <b>GRF12</b> | Glyma.07G03840<br>0             | GRMZM2G119359†                 | Solyc10g083510                           | Bradi5g1896<br>1*                             | LOC_Os04g485<br>10               |                                          |
| <b>GRF13</b> | Glyma.11G11070<br>0             | GRMZM2G018414                  | Solyc08g079800                           |                                               |                                  |                                          |
| <b>GRF14</b> | Glyma.12G01470<br>0             | GRMZM2G098594                  |                                          |                                               |                                  |                                          |
| <b>GRF15</b> | Glyma.01G23440<br>0             | GRMZM2G045977*                 |                                          |                                               |                                  |                                          |
| <b>GRF16</b> | Glyma.11G00850<br>0             | GRMZM2G124566*                 |                                          |                                               |                                  |                                          |
| <b>GRF17</b> | Glyma.09G21250<br>0             | GRMZM2G178261*                 |                                          |                                               |                                  |                                          |

| <b>GRF n°</b> | <i>Glycine max</i> <sup>a</sup> | <i>Zea mays</i> <sup>*,b</sup> | <i>Solanum lycopersicum</i> <sup>c</sup> | <i>Brachypodium distachyon</i> <sup>*,d</sup> | <i>Oryza sativa</i> <sup>e</sup> | <i>Arabidopsis thaliana</i> <sup>f</sup> |
|---------------|---------------------------------|--------------------------------|------------------------------------------|-----------------------------------------------|----------------------------------|------------------------------------------|
| <b>GRF18</b>  | Glyma.01G14860<br>0             | GRMZM5G853392*                 |                                          |                                               |                                  |                                          |
| <b>GRF19</b>  | Glyma.03G19220<br>0             |                                |                                          |                                               |                                  |                                          |
| <b>GRF20</b>  | Glyma.19G19270<br>0             |                                |                                          |                                               |                                  |                                          |
| <b>GRF21</b>  | Glyma.10G06720<br>0             |                                |                                          |                                               |                                  |                                          |
| <b>GRF22</b>  | Glyma.11G20880<br>0             |                                |                                          |                                               |                                  |                                          |
| <b>GRF23</b>  | Glyma.01G14490<br>0             |                                |                                          |                                               |                                  |                                          |
| <b>GRF24</b>  | Glyma.03G02190<br>0             |                                |                                          |                                               |                                  |                                          |

† ZmGRF8: QLQ was not found

† ZmGRF9: WRC was not found

† ZmGRF12: QLQ and WRC were not found

\* Genes named in this work

<sup>a</sup> Liu et al., 2017

<sup>b</sup> Zhang et al., 2008

<sup>c</sup> Khatun et al., 2017

<sup>d</sup> Filiz et al., 2014

<sup>e</sup> Kim et al., 2004

<sup>f</sup> Kim et al., 2003
