# Supplementary material for: Molecular evolution and diversification of the GRF transcription factor family
Source: PubMed Central journal article supplement (PMC7380329; doi:10.1590/1678-4685-gmb-2020-0080), 2020-07-24
Supplement: 1415-4757-GMB-43-3-e20200080-suppl4.pdf [file 1415-4757-GMB-43-3-e20200080-suppl4.pdf]

## Supplementary Material to “Molecular evolution and diversification of the GRF transcription factor family”

**Table S4** – Site and branch-site model analysis

| Gene family                         | Comparison           | Parameters/significance   |
|-------------------------------------|----------------------|---------------------------|
| Site model analysis                 |                      |                           |
| SNF2-GRF                            | M3 vs. M0            | $2\Delta L=382$ (df=4)*** |
|                                     | M2 vs. M1            | $2\Delta L=0$ (df=2)      |
|                                     | M8 vs. M7            | $2\Delta L=0$ (df=2)      |
| Branch-site model analysis          |                      |                           |
| GRF (foreground), SNF2 (background) | Alternative vs. Null | $2\Delta L=5,59$ (df=1)*  |

\*\*\* $p<0.001$ ; \*  $p<0.05$
