# Supplementary material for: Molecular evolution and diversification of the GRF transcription factor family
Source: PubMed Central journal article supplement (PMC7380329; doi:10.1590/1678-4685-gmb-2020-0080), 2020-07-24
Supplement: 1415-4757-GMB-43-3-e20200080-suppl5.pdf [file 1415-4757-GMB-43-3-e20200080-suppl5.pdf]

## Supplementary Material to “Molecular evolution and diversification of the GRF transcription factor family”

**Table S5** – GO terms and enrichment analysis of putative targets of GRFs in rice

| <b>Gene Ontology biological process</b>         | <b>Fold Enrichment</b> | <b>+/-</b> | <b>P value</b> |
|-------------------------------------------------|------------------------|------------|----------------|
| response to gamma radiation                     | 34.29                  | +          | 2.87E-02       |
| response to stimulus                            | 1.32                   | +          | 3.36E-03       |
| regulation of leaf development                  | 34.29                  | +          | 2.87E-02       |
| regulation of endosperm development             | 34.29                  | +          | 2.87E-02       |
| regulation of adaxial/abaxial pattern formation | 34.29                  | +          | 2.87E-02       |
| glycolipid translocation                        | 34.29                  | +          | 2.87E-02       |
| single-organism process                         | 1.25                   | +          | 1.67E-04       |
| cellular component organization                 | 1.30                   | +          | 2.58E-02       |
| cellular process                                | 1.17                   | +          | 2.83E-04       |
| cellular component organization or biogenesis   | 1.28                   | +          | 2.50E-02       |
| single-organism cellular process                | 1.29                   | +          | 2.52E-03       |
| glycolipid transport                            | 34.29                  | +          | 2.87E-02       |
| triglyceride catabolic process                  | 34.29                  | +          | 2.87E-02       |
| cellular lipid metabolic process                | 1.58                   | +          | 2.59E-02       |
| lipid metabolic process                         | 1.58                   | +          | 7.93E-03       |
| organic substance metabolic process             | 1.23                   | +          | 2.51E-05       |
| metabolic process                               | 1.21                   | +          | 7.78E-06       |
| primary metabolic process                       | 1.22                   | +          | 6.87E-05       |
| single-organism metabolic process               | 1.37                   | +          | 1.18E-04       |
| cellular metabolic process                      | 1.23                   | +          | 6.46E-05       |
| acylglycerol catabolic process                  | 34.29                  | +          | 2.87E-02       |
| neutral lipid catabolic process                 | 34.29                  | +          | 2.87E-02       |
| cellular lipid catabolic process                | 5.28                   | +          | 1.14E-03       |
| lipid catabolic process                         | 2.64                   | +          | 1.88E-02       |
| organic substance catabolic process             | 1.44                   | +          | 5.56E-03       |
| catabolic process                               | 1.44                   | +          | 2.40E-03       |
| cellular catabolic process                      | 1.39                   | +          | 1.71E-02       |
| glycerolipid catabolic process                  | 17.15                  | +          | 6.29E-03       |
| pollen tube guidance                            | 34.29                  | +          | 2.87E-02       |
| reproductive process                            | 1.65                   | +          | 4.32E-02       |
| reproduction                                    | 1.65                   | +          | 4.32E-02       |
| positive chemotaxis                             | 34.29                  | +          | 2.87E-02       |
| chemotaxis                                      | 34.29                  | +          | 2.87E-02       |
| taxis                                           | 34.29                  | +          | 2.87E-02       |
| locomotion                                      | 11.43                  | +          | 1.36E-02       |
| developmental process involved in reproduction  | 2.47                   | +          | 1.24E-02       |
| anatomical structure development                | 1.60                   | +          | 3.72E-02       |
| protein-FAD linkage                             | 34.29                  | +          | 2.87E-02       |
| cellular protein modification process           | 1.24                   | +          | 1.87E-02       |
| protein modification process                    | 1.24                   | +          | 1.87E-02       |
| protein metabolic process                       | 1.27                   | +          | 1.70E-03       |
| macromolecule metabolic process                 | 1.23                   | +          | 2.90E-04       |
| organonitrogen compound metabolic process       | 1.25                   | +          | 9.26E-04       |
| nitrogen compound metabolic process             | 1.19                   | +          | 1.02E-03       |
| macromolecule modification                      | 1.18                   | +          | 3.91E-02       |
| cellular protein metabolic process              | 1.20                   | +          | 2.40E-02       |
| cellular macromolecule metabolic process        | 1.19                   | +          | 4.19E-03       |
| 7-methylguanosine cap hypermethylation          | 34.29                  | +          | 2.87E-02       |
| RNA capping                                     | 9.80                   | +          | 1.82E-02       |
| cell projection morphogenesis                   | 34.29                  | +          | 2.87E-02       |
| cell part morphogenesis                         | 34.29                  | +          | 2.87E-02       |
| phytochromobilin biosynthetic process           | 34.29                  | +          | 2.87E-02       |

| Gene Ontology biological process                                      | Fold Enrichment | +/- | P value  |
|-----------------------------------------------------------------------|-----------------|-----|----------|
| phytochromobilin metabolic process                                    | 34.29           | +   | 2.87E-02 |
| cofactor metabolic process                                            | 2.00            | +   | 6.54E-03 |
| cofactor biosynthetic process                                         | 2.08            | +   | 2.53E-02 |
| self proteolysis                                                      | 34.29           | +   | 2.87E-02 |
| proteolysis                                                           | 1.50            | +   | 2.58E-03 |
| Rho protein signal transduction                                       | 34.29           | +   | 2.87E-02 |
| cellular response to stimulus                                         | 1.27            | +   | 3.52E-02 |
| cyanate metabolic process                                             | 34.29           | +   | 2.87E-02 |
| organic acid metabolic process                                        | 1.55            | +   | 9.31E-03 |
| small molecule metabolic process                                      | 1.42            | +   | 1.03E-02 |
| mitochondrial respiratory chain complex II assembly                   | 34.29           | +   | 2.87E-02 |
| respiratory chain complex II assembly                                 | 34.29           | +   | 2.87E-02 |
| mitochondrial respiratory chain complex II biogenesis                 | 34.29           | +   | 2.87E-02 |
| regulation of double-strand break repair via homologous recombination | 34.29           | +   | 2.87E-02 |
| regulation of DNA recombination                                       | 34.29           | +   | 2.87E-02 |
| regulation of nucleobase-containing compound metabolic process        | 0.76            | -   | 3.38E-02 |
| meiotic telophase I                                                   | 34.29           | +   | 2.87E-02 |
| telophase                                                             | 34.29           | +   | 2.87E-02 |
| regulation of meristem structural organization                        | 34.29           | +   | 2.87E-02 |
| plant epidermal cell fate specification                               | 34.29           | +   | 2.87E-02 |
| meGasporogenesis                                                      | 22.86           | +   | 3.61E-03 |
| embryo sac development                                                | 13.72           | +   | 9.64E-03 |
| gametophyte development                                               | 5.28            | +   | 7.54E-03 |
| plant-type sporogenesis                                               | 13.72           | +   | 9.64E-03 |
| meiotic cell cycle process                                            | 3.24            | +   | 2.07E-02 |
| meiotic cell cycle                                                    | 3.17            | +   | 1.30E-02 |
| cell cycle                                                            | 2.13            | +   | 4.62E-03 |
| cell cycle process                                                    | 2.36            | +   | 5.98E-03 |
| sexual sporulation                                                    | 13.72           | +   | 9.64E-03 |
| sexual reproduction                                                   | 5.08            | +   | 8.58E-03 |
| multi-organism reproductive process                                   | 5.08            | +   | 8.58E-03 |
| sporulation                                                           | 13.72           | +   | 9.64E-03 |
| phospholipid catabolic process                                        | 17.15           | +   | 7.82E-04 |
| phosphate-containing compound metabolic process                       | 1.25            | +   | 2.09E-02 |
| phosphorus metabolic process                                          | 1.26            | +   | 1.68E-02 |
| organophosphate catabolic process                                     | 5.41            | +   | 1.88E-02 |
| cellular response to nitrate                                          | 17.15           | +   | 6.29E-03 |
| cellular response to reactive nitrogen species                        | 17.15           | +   | 6.29E-03 |
| response to nitrate                                                   | 11.43           | +   | 1.36E-02 |
| cellular response to inorganic substance                              | 5.72            | +   | 4.86E-02 |
| microsporogenesis                                                     | 13.72           | +   | 9.64E-03 |
| pollen development                                                    | 5.49            | +   | 6.60E-03 |
| NADP biosynthetic process                                             | 13.72           | +   | 9.64E-03 |
| nicotinamide nucleotide biosynthetic process                          | 5.72            | +   | 4.86E-02 |
| pyridine nucleotide biosynthetic process                              | 5.72            | +   | 4.86E-02 |
| pyridine nucleotide metabolic process                                 | 2.18            | +   | 4.49E-02 |
| oxidoreduction coenzyme metabolic process                             | 2.49            | +   | 1.19E-02 |
| coenzyme metabolic process                                            | 2.18            | +   | 6.24E-03 |
| coenzyme biosynthetic process                                         | 2.24            | +   | 3.97E-02 |
| single-organism biosynthetic process                                  | 1.46            | +   | 4.80E-03 |
| nicotinamide nucleotide metabolic process                             | 2.18            | +   | 4.49E-02 |
| embryo development ending in seed dormancy                            | 12.86           | +   | 1.77E-03 |
| embryo development                                                    | 12.86           | +   | 1.77E-03 |
| seed development                                                      | 4.29            | +   | 3.41E-02 |
| fruit development                                                     | 3.96            | +   | 4.16E-02 |
| attachment of GPI anchor to protein                                   | 11.43           | +   | 1.36E-02 |
| GPI anchor biosynthetic process                                       | 4.68            | +   | 2.74E-02 |
| GPI anchor metabolic process                                          | 4.68            | +   | 2.74E-02 |
| lipid biosynthetic process                                            | 1.64            | +   | 3.14E-02 |
| phosphatidylinositol biosynthetic process                             | 4.42            | +   | 1.36E-02 |
| apoptotic process                                                     | 11.43           | +   | 1.36E-02 |
| meiotic DNA double-strand break formation                             | 11.43           | +   | 1.36E-02 |
| protein deneddylation                                                 | 10.29           | +   | 3.32E-03 |
| histone H3-K9 demethylation                                           | 9.80            | +   | 1.82E-02 |
| histone lysine demethylation                                          | 7.62            | +   | 2.90E-02 |

| Gene Ontology biological process                        | Fold Enrichment | +/- | P value  |
|---------------------------------------------------------|-----------------|-----|----------|
| histone demethylation                                   | 6.86            | +   | 3.51E-02 |
| protein demethylation                                   | 6.23            | +   | 4.16E-02 |
| protein dealkylation                                    | 6.23            | +   | 4.16E-02 |
| threonine biosynthetic process                          | 9.80            | +   | 1.82E-02 |
| carboxylic acid metabolic process                       | 1.46            | +   | 2.71E-02 |
| oxoacid metabolic process                               | 1.51            | +   | 1.47E-02 |
| threonine metabolic process                             | 8.57            | +   | 2.33E-02 |
| nitrate transport                                       | 9.80            | +   | 1.82E-02 |
| 7-methylguanosine RNA capping                           | 9.80            | +   | 1.82E-02 |
| anther wall tapetum development                         | 9.80            | +   | 1.82E-02 |
| anther development                                      | 6.86            | +   | 3.51E-02 |
| RNA (guanine-N7)-methylation                            | 7.62            | +   | 2.90E-02 |
| regulation of cell proliferation                        | 6.86            | +   | 3.51E-02 |
| DNA catabolic process                                   | 6.23            | +   | 4.16E-02 |
| DNA metabolic process                                   | 1.63            | +   | 3.28E-02 |
| hexose catabolic process                                | 5.72            | +   | 4.86E-02 |
| single-organism carbohydrate metabolic process          | 1.80            | +   | 8.19E-03 |
| carbohydrate metabolic process                          | 1.41            | +   | 2.54E-02 |
| single-organism carbohydrate catabolic process          | 2.33            | +   | 3.35E-02 |
| carbohydrate catabolic process                          | 1.83            | +   | 2.90E-02 |
| 3'-UTR-mediated mRNA destabilization                    | 5.72            | +   | 4.86E-02 |
| mRNA destabilization                                    | 5.72            | +   | 4.86E-02 |
| regulation of mRNA stability                            | 5.72            | +   | 4.86E-02 |
| RNA destabilization                                     | 5.72            | +   | 4.86E-02 |
| glucuronoxylan biosynthetic process                     | 5.72            | +   | 4.86E-02 |
| glucuronoxylan metabolic process                        | 5.72            | +   | 4.86E-02 |
| xylan metabolic process                                 | 3.71            | +   | 2.42E-02 |
| hemicellulose metabolic process                         | 3.23            | +   | 4.00E-03 |
| cell wall polysaccharide metabolic process              | 3.23            | +   | 4.00E-03 |
| polysaccharide metabolic process                        | 2.17            | +   | 1.03E-03 |
| cell wall macromolecule metabolic process               | 2.45            | +   | 1.86E-02 |
| xylan biosynthetic process                              | 4.90            | +   | 2.43E-02 |
| cell wall polysaccharide biosynthetic process           | 4.90            | +   | 2.43E-02 |
| cellular polysaccharide biosynthetic process            | 2.64            | +   | 8.38E-03 |
| cellular polysaccharide metabolic process               | 2.40            | +   | 2.77E-03 |
| cellular carbohydrate metabolic process                 | 1.87            | +   | 1.19E-02 |
| polysaccharide biosynthetic process                     | 2.35            | +   | 1.20E-02 |
| carbohydrate biosynthetic process                       | 1.75            | +   | 4.65E-02 |
| cellular carbohydrate biosynthetic process              | 2.07            | +   | 2.62E-02 |
| cell wall macromolecule biosynthetic process            | 4.47            | +   | 3.06E-02 |
| cellular component macromolecule biosynthetic process   | 4.47            | +   | 3.06E-02 |
| cell wall biogenesis                                    | 2.94            | +   | 4.28E-03 |
| glycogen metabolic process                              | 5.14            | +   | 2.15E-02 |
| cellular glucan metabolic process                       | 2.26            | +   | 1.13E-02 |
| glucan metabolic process                                | 2.38            | +   | 5.73E-03 |
| energy reserve metabolic process                        | 5.14            | +   | 2.15E-02 |
| generation of precursor metabolites and energy          | 1.67            | +   | 4.69E-02 |
| oxidation-reduction process                             | 1.36            | +   | 6.80E-03 |
| one-carbon metabolic process                            | 5.08            | +   | 8.58E-03 |
| root development                                        | 4.47            | +   | 3.06E-02 |
| root system development                                 | 4.47            | +   | 3.06E-02 |
| methionine metabolic process                            | 4.29            | +   | 3.41E-02 |
| branched-chain amino acid biosynthetic process          | 4.12            | +   | 3.77E-02 |
| DNA duplex unwinding                                    | 3.57            | +   | 1.42E-02 |
| DNA geometric change                                    | 3.43            | +   | 1.66E-02 |
| ribonucleoprotein complex export from nucleus           | 3.43            | +   | 3.09E-02 |
| protein export from nucleus                             | 3.05            | +   | 4.42E-02 |
| ribonucleoprotein complex localization                  | 3.43            | +   | 3.09E-02 |
| double-strand break repair via homologous recombination | 3.27            | +   | 3.59E-02 |
| recombinational repair                                  | 3.27            | +   | 3.59E-02 |
| DNA repair                                              | 1.95            | +   | 1.52E-02 |
| cellular response to DNA damage stimulus                | 1.86            | +   | 2.17E-02 |
| response to stress                                      | 1.43            | +   | 7.36E-03 |
| DNA recombination                                       | 3.99            | +   | 2.79E-04 |
| double-strand break repair                              | 2.72            | +   | 3.90E-02 |
| plant-type cell wall biogenesis                         | 2.72            | +   | 3.90E-02 |

| <b>Gene Ontology biological process</b>                     | <b>Fold Enrichment</b> | <b>+/-</b> | <b>P value</b> |
|-------------------------------------------------------------|------------------------|------------|----------------|
| plant-type cell wall organization or biogenesis             | 1.97                   | +          | 3.43E-02       |
| pyruvate metabolic process                                  | 2.53                   | +          | 2.31E-02       |
| cell division                                               | 2.43                   | +          | 1.95E-02       |
| microtubule-based process                                   | 2.18                   | +          | 4.49E-02       |
| hydrogen peroxide catabolic process                         | 2.05                   | +          | 4.56E-02       |
| hydrogen peroxide metabolic process                         | 2.05                   | +          | 4.56E-02       |
| protein dephosphorylation                                   | 1.98                   | +          | 3.32E-02       |
| dephosphorylation                                           | 1.64                   | +          | 4.06E-02       |
| cell wall organization                                      | 1.64                   | +          | 3.08E-02       |
| external encapsulating structure organization               | 1.62                   | +          | 3.50E-02       |
| regulation of transcription from RNA polymerase II promoter | 0.38                   | -          | 1.96E-02       |
| regulation of transcription, DNA-templated                  | 0.76                   | -          | 3.56E-02       |
| regulation of nucleic acid-templated transcription          | 0.75                   | -          | 3.10E-02       |
| regulation of RNA biosynthetic process                      | 0.75                   | -          | 3.10E-02       |
| regulation of RNA metabolic process                         | 0.75                   | -          | 2.77E-02       |
