# Supplementary material for: Molecular evolution and diversification of the GRF transcription factor family
Source: PubMed Central journal article supplement (PMC7380329; doi:10.1590/1678-4685-gmb-2020-0080), 2020-07-24
Supplement: 1415-4757-GMB-43-3-e20200080-suppl6.pdf [file 1415-4757-GMB-43-3-e20200080-suppl6.pdf]

## Supplementary Material to “Molecular evolution and diversification of the GRF transcription factor family”

**Table S6** – Annotation of 1270 putative targets of GRFs in rice genome

|              |              |              |              |              |              |
|--------------|--------------|--------------|--------------|--------------|--------------|
| OS03G0724600 | OS02G0612900 | OS02G0674400 | OS06G0346600 | OS08G0202300 | OS10G0499200 |
| OS03G0803700 | OS01G0117900 | OS11G0260200 | OS08G0360100 | OS08G0561250 | OS11G0173366 |
| OS12G0637100 | OS02G0223200 | OS01G0348700 | OS11G0252400 | OS02G0514500 | OS10G0190600 |
| OS08G0120500 | OS05G0154800 | OS06G0681200 | OS12G0169400 | OS07G0490800 | OS05G0358400 |
| OS02G0158500 | OS09G0530300 | OS10G0537450 | OS09G0472700 | OS12G0133700 | OS09G0418800 |
| OS05G0404000 | OS01G0209000 | OS07G0125500 | OS02G0805300 | OS05G0131000 | OS04G0331650 |
| OS06G0691800 | OS04G0502800 | OS12G0443000 | OS04G0551500 | OS04G0599300 | OS11G0644000 |
| OS01G0609501 | OS01G0503400 | OS07G0502550 | OS10G0342650 | OS07G0272300 | OS07G0588900 |
| OS10G0539200 | OS02G0280400 | OS05G0207900 | OS06G0102750 | OS05G0454400 | OS07G0564533 |
| OS07G0148800 | OS01G0750666 | OS01G0919200 | OS11G0275900 | OS10G0170200 | OS08G0190500 |
| OS04G0121200 | OS12G0110150 | OS03G0312500 | OS03G0269700 | OS12G0539751 | OS02G0465000 |
| OS02G0146400 | OS05G0499300 | OS10G0480900 | OS03G0701900 | OS12G0589400 | OS04G0530801 |
| OS03G0383800 | OS12G0236800 | OS05G0481400 | OS09G0410300 | OS07G0673801 | OS03G0803800 |
| OS09G0399502 | OS11G0119311 | OS02G0184450 | OS09G0536300 | OS09G0440600 | OS12G0284800 |
| OS03G0818400 | OS07G0523150 | OS02G0299600 | OS09G0443400 | OS07G0294700 | OS10G0148400 |
| OS03G0821900 | OS11G0268300 | OS05G0393200 | OS09G0423500 | OS02G0102900 | OS07G0599201 |
| OS09G0539500 | OS03G0106300 | OS09G0439600 | OS07G0294600 | OS03G0751400 | OS05G0534400 |
| OS08G0248300 | OS04G0559400 | OS09G0407950 | OS02G0658300 | OS07G0191600 | OS03G0193901 |
| OS01G0263300 | OS06G0217600 | OS02G0621700 | OS03G0837100 | OS01G0575400 | OS10G0345701 |
| OS02G0764700 | OS12G0631100 | OS04G0450500 | OS01G0182900 | OS07G0563700 | OS02G0756200 |
| OS04G0656800 | OS06G0508950 | OS01G0897200 | OS02G0787250 | OS03G0126450 | OS03G0643611 |
| OS01G0653800 | OS12G0132900 | OS02G0128000 | OS02G0655750 | OS09G0498000 | OS02G0806350 |
| OS11G0130800 | OS01G0128100 | OS07G0567801 | OS06G0186400 | OS09G0397800 | OS04G0623600 |
| OS10G0581000 | OS02G0211200 | OS03G0805700 | OS12G0578600 | OS06G0153000 | OS04G0679400 |
| OS06G0679750 | OS09G0283600 | OS03G0742400 | OS02G0316200 | OS08G0529100 | OS08G0307300 |
| OS10G0518400 | OS09G0322100 | OS05G0390100 | OS08G0499300 | OS06G0136900 | OS10G0359500 |
| OS07G0627000 | OS01G0185000 | OS05G0198100 | OS04G0407350 | OS01G0167750 | OS07G0591400 |
| OS10G0493600 | OS07G0139700 | OS01G0223500 | OS08G0206700 | OS10G0464300 | OS04G0423200 |
| OS09G0411500 | OS01G0286500 | OS03G0770900 | OS08G0524600 | OS02G0684900 | OS01G0714225 |
| OS11G0105750 | OS03G0797000 | OS01G0531200 | OS07G0423700 | OS09G0135100 | OS05G0326600 |
| OS02G0724600 | OS06G0676400 | OS01G0238850 | OS04G0630551 | OS12G0166100 | OS02G0574600 |
| OS01G0621900 | OS08G0461100 | OS09G0432231 | OS12G0143300 | OS02G0682700 | OS03G0846400 |
| OS06G0493700 | OS09G0324000 | OS10G0146901 | OS01G0694000 | OS01G0511100 | OS01G0824500 |
| OS03G0235400 | OS11G0676200 | OS05G0137400 | OS08G0164300 | OS03G0579900 | OS01G0207300 |
| OS04G0252850 | OS02G0811101 | OS01G0118700 | OS04G0444050 | OS05G0567600 | OS03G0213700 |
| OS10G0434650 | OS11G0435500 | OS10G0159600 | OS12G0438300 | OS06G0657750 | OS03G0130400 |
| OS01G0656400 | OS09G0496250 | OS06G0298400 | OS06G0688300 | OS10G0560000 | OS05G0150000 |

|              |              |              |              |              |              |
|--------------|--------------|--------------|--------------|--------------|--------------|
| OS06G0597200 | OS12G0237900 | OS11G0133300 | OS02G0141100 | OS12G0264500 | OS10G0559200 |
| OS03G0370800 | OS02G0208400 | OS10G0130500 | OS06G0153100 | OS05G0558400 | OS07G0644400 |
| OS06G0621100 | OS06G0643800 | OS03G0604700 | OS02G0760000 | OS05G0203912 | OS03G0243750 |
| OS03G0302800 | OS01G0928000 | OS11G0591700 | OS07G0578333 | OS08G0509400 | OS11G0578100 |
| OS12G0290600 | OS04G0310900 | OS05G0443500 | OS12G0582666 | OS08G0468300 | OS07G0597500 |
| OS03G0158000 | OS10G0406100 | OS03G0745700 | OS06G0677600 | OS12G0183450 | OS07G0667100 |
| OS07G0160050 | OS04G0604300 | OS03G0105700 | OS01G0242500 | OS04G0657600 | OS01G0164300 |
| OS03G0756000 | OS06G0140200 | OS02G0604600 | OS10G0498800 | OS10G0422401 | OS05G0564700 |
| OS01G0833500 | OS01G0220801 | OS02G0467700 | OS03G0298300 | OS06G0663600 | OS07G0187300 |
| OS12G0233300 | OS01G0219200 | OS01G0279200 | OS02G0614966 | OS08G0506000 | OS11G0188100 |
| OS06G0134750 | OS08G0510900 | OS08G0379000 | OS05G0151300 | OS02G0125600 | OS07G0623000 |
| OS08G0386900 | OS05G0192500 | OS03G0221600 | OS05G0451200 | OS07G0619100 | OS12G0503200 |
| OS02G0782500 | OS01G0656250 | OS04G0581600 | OS07G0546400 | OS08G0437050 | OS02G0106100 |
| OS06G0152400 | OS04G0652450 | OS10G0341700 | OS10G0513300 | OS02G0111800 | OS07G0255900 |
| OS06G0651300 | OS05G0494200 | OS10G0519500 | OS05G0126501 | OS03G0219300 | OS05G0507300 |
| OS12G0631600 | OS02G0187300 | OS07G0577500 | OS02G0144800 | OS01G0728200 | OS02G0115900 |
| OS02G0149500 | OS01G0915000 | OS10G0570200 | OS07G0176200 | OS11G0107500 | OS05G0110100 |
| OS12G0477200 | OS10G0522200 | OS02G0780600 | OS06G0266266 | OS03G0836200 | OS08G0285301 |
| OS03G0639233 | OS01G0337180 | OS06G0627001 | OS12G0105300 | OS02G0245800 | OS01G0159800 |
| OS03G0654500 | OS07G0456700 | OS03G0200400 | OS10G0500600 | OS07G0577801 | OS12G0580500 |
| OS06G0121200 | OS11G0506150 | OS06G0350700 | OS05G0227901 | OS02G0248200 | OS08G0374100 |
| OS12G0577900 | OS02G0778300 | OS11G0183800 | OS02G0565500 | OS02G0595800 | OS03G0134550 |
| OS10G0548200 | OS12G0164800 | OS03G0283500 | OS01G0605400 | OS08G0240566 | OS08G0149566 |
| OS11G0629600 | OS03G0439650 | OS01G0844800 | OS01G0812050 | OS12G0180400 | OS05G0204900 |
| OS06G0165600 | OS02G0823800 | OS10G0406900 | OS04G0142850 | OS06G0329200 | OS02G0184200 |
| OS12G0124700 | OS01G0919100 | OS10G0524700 | OS02G0759500 | OS04G0490600 | OS07G0678700 |
| OS01G0719100 | OS04G0482100 | OS08G0187800 | OS01G0111000 | OS03G0241900 | OS12G0529900 |
| OS08G0159700 | OS08G0440850 | OS11G0514800 | OS04G0690932 | OS02G0160400 | OS06G0688800 |
| OS06G0349800 | OS08G0564000 | OS11G0676100 | OS03G0276800 | OS02G0644466 | OS09G0305900 |
| OS08G0488100 | OS12G0244150 | OS03G0234900 | OS07G0202000 | OS01G0252400 | OS07G0641200 |
| OS07G0516600 | OS01G0811100 | OS04G0644700 | OS10G0575600 | OS04G0671900 | OS03G0609200 |
| OS04G0420801 | OS03G0760700 | OS01G0861900 | OS04G0650600 | OS06G0139200 | OS01G0167100 |
| OS04G0584750 | OS09G0298266 | OS08G0564500 | OS10G0130200 | OS02G0328300 | OS12G0502800 |
| OS08G0403733 | OS01G0548750 | OS02G0704000 | OS10G0330600 | OS12G0242500 | OS06G0161800 |
| OS07G0659100 | OS07G0185100 | OS06G0233200 | OS04G0167800 | OS01G0110600 | OS12G0411700 |
| OS04G0382300 | OS01G0548600 | OS05G0137200 | OS03G0320850 | OS03G0399000 | OS03G0247750 |
| OS11G0674400 | OS02G0521600 | OS04G0640300 | OS08G0396200 | OS05G0101600 | OS03G0391700 |
| OS08G0504600 | OS04G0377932 | OS04G0321700 | OS10G0404500 | OS05G0529900 | OS09G0401100 |
| OS11G0184100 | OS01G0548900 | OS04G0629700 | OS04G0488400 | OS10G0102400 | OS01G0276700 |
| OS07G0509300 | OS12G0630600 | OS05G0150600 | OS01G0945666 | OS11G0194200 | OS03G0255500 |
| OS12G0222650 | OS06G0326400 | OS02G0327700 | OS10G0437700 | OS01G0976950 | OS09G0386200 |
| OS04G0348100 | OS01G0107750 | OS03G0228200 | OS03G0840500 | OS02G0730775 | OS08G0139000 |
| OS11G0192400 | OS05G0482650 | OS06G0212100 | OS06G0611000 | OS03G0638800 | OS03G0111100 |
| OS07G0244200 | OS03G0725100 | OS05G0276100 | OS07G0194500 | OS07G0519725 | OS04G0648700 |

|              |              |              |              |              |              |
|--------------|--------------|--------------|--------------|--------------|--------------|
| OS04G0472200 | OS02G0581000 | OS01G0772400 | OS03G0314700 | OS02G0152800 | OS04G0488800 |
| OS07G0672175 | OS09G0438700 | OS10G0557750 | OS01G0752100 | OS05G0455500 | OS12G0124100 |
| OS02G0107900 | OS03G0195500 | OS03G0737300 | OS12G0559200 | OS05G0182100 | OS12G0628100 |
| OS09G0461500 | OS11G0189900 | OS05G0464350 | OS05G0366900 | OS11G0282600 | OS07G0123601 |
| OS10G0512500 | OS01G0183400 | OS04G0313500 | OS06G0621800 | OS07G0270900 | OS01G0872600 |
| OS08G0471300 | OS11G0638900 | OS03G0208750 | OS08G0516500 | OS09G0559500 | OS09G0482740 |
| OS04G0498800 | OS01G0727840 | OS01G0680700 | OS11G0629566 | OS08G0417000 | OS11G0144900 |
| OS03G0432100 | OS10G0389500 | OS04G0308100 | OS01G0737100 | OS04G0297933 | OS10G0578900 |
| OS01G0933075 | OS07G0181000 | OS03G0638000 | OS12G0609500 | OS11G0528300 | OS06G0712300 |
| OS06G0695350 | OS01G0579900 | OS07G0599600 | OS02G0114200 | OS02G0142250 | OS08G0351300 |
| OS06G0125400 | OS05G0501800 | OS02G0741000 | OS08G0234200 | OS07G0546501 | OS10G0421500 |
| OS12G0621300 | OS12G0289600 | OS01G0566050 | OS08G0482100 | OS01G0888900 | OS02G0176400 |
| OS10G0556100 | OS06G0162100 | OS08G0100600 | OS07G0657300 | OS12G0605850 | OS01G0905400 |
| OS08G0163900 | OS09G0243000 | OS04G0675300 | OS11G0150801 | OS02G0248300 | OS01G0514450 |
| OS05G0428000 | OS02G0745700 | OS01G0635800 | OS05G0393100 | OS08G0512600 | OS07G0178700 |
| OS01G0763850 | OS01G0866500 | OS04G0526600 | OS01G0229400 | OS03G0155300 | OS07G0237900 |
| OS01G0955000 | OS12G0630500 | OS01G0585600 | OS11G0490300 | OS08G0102050 | OS04G0204100 |
| OS07G0686950 | OS05G0120800 | OS04G0320700 | OS01G0332700 | OS03G0257000 | OS04G0524800 |
| OS07G0190000 | OS01G0895500 | OS05G0591550 | OS04G0541900 | OS11G0202500 | OS01G0215500 |
| OS03G0797300 | OS08G0414200 | OS06G0179400 | OS01G0834100 | OS01G0338000 | OS12G0161700 |
| OS02G0220000 | OS07G0203925 | OS09G0311600 | OS11G0121000 | OS02G0194400 | OS07G0665000 |
| OS07G0516650 | OS04G0475100 | OS07G0605800 | OS12G0160650 | OS03G0120100 | OS07G0184200 |
| OS02G0143400 | OS01G0802000 | OS03G0181675 | OS01G0714100 | OS12G0168150 | OS04G0373400 |
| OS03G0566700 | OS03G0320800 | OS04G0306300 | OS12G0225150 | OS03G0734100 | OS05G0395116 |
| OS11G0137050 | OS02G0761600 | OS07G0105000 | OS05G0555450 | OS01G0172900 | OS08G0424100 |
| OS03G0700700 | OS11G0158500 | OS06G0186300 | OS06G0146700 | OS03G0171900 | OS08G0105400 |
| OS09G0507701 | OS02G0784400 | OS07G0435900 | OS02G0173100 | OS08G0352100 | OS04G0174100 |
| OS04G0436400 | OS10G0578050 | OS12G0129650 | OS11G0572500 | OS02G0234500 | OS03G0104000 |
| OS02G0581900 | OS07G0141700 | OS03G0311300 | OS05G0524400 | OS06G0148900 | OS01G0564300 |
| OS04G0167875 | OS11G0199600 | OS04G0580700 | OS06G0520733 | OS06G0656566 | OS04G0401200 |
| OS10G0561000 | OS04G0429300 | OS05G0358000 | OS07G0649300 | OS01G0510901 | OS10G0150300 |
| OS10G0553900 | OS02G0197400 | OS03G0180300 | OS01G0266500 | OS02G0779300 | OS11G0474566 |
| OS01G0144000 | OS03G0659700 | OS09G0481700 | OS02G0281150 | OS08G0556400 | OS01G0670500 |
| OS12G0183100 | OS09G0569780 | OS02G0776800 | OS04G0523812 | OS09G0121000 | OS10G0142700 |
| OS02G0623600 | OS11G0423800 | OS01G0654450 | OS09G0317700 | OS01G0318700 | OS02G0709400 |
| OS02G0150450 | OS01G0834250 | OS08G0561600 | OS07G0628700 | OS07G0242700 | OS01G0706400 |
| OS05G0128350 | OS01G0165800 | OS11G0170100 | OS04G0211900 | OS12G0168900 | OS07G0137600 |
| OS05G0556650 | OS02G0614400 | OS04G0622800 | OS12G0113001 | OS05G0429802 | OS01G0771900 |
| OS06G0339800 | OS04G0483600 | OS02G0106201 | OS01G0597701 | OS11G0669100 | OS04G0590950 |
| OS05G0549700 | OS01G0653350 | OS08G0119000 | OS10G0542750 | OS03G0141800 | OS04G0623066 |
| OS04G0677650 | OS02G0203700 | OS08G0550400 | OS09G0558100 | OS11G0481500 | OS11G0707900 |
| OS06G0140800 | OS12G0591500 | OS05G0508900 | OS01G0622033 | OS06G0331900 | OS02G0153300 |
| OS04G0568800 | OS10G0578950 | OS09G0481200 | OS06G0226500 | OS10G0130900 | OS02G0793300 |
| OS02G0109400 | OS11G0170000 | OS05G0267732 | OS10G0502400 | OS04G0221300 | OS04G0578400 |

|              |              |              |              |              |              |
|--------------|--------------|--------------|--------------|--------------|--------------|
| OS02G0541300 | OS08G0248000 | OS04G0433600 | OS07G0187000 | OS06G0496800 | OS06G0207783 |
| OS10G0205300 | OS12G0114100 | OS10G0363100 | OS10G0209700 | OS03G0202500 | OS01G0115950 |
| OS03G0236800 | OS07G0174700 | OS07G0208533 | OS01G0937600 | OS03G0206100 | OS03G0328100 |
| OS01G0949400 | OS01G0966801 | OS01G0899800 | OS01G0589100 | OS07G0117600 | OS08G0206800 |
| OS11G0523500 | OS06G0602900 | OS08G0544600 | OS02G0298200 | OS03G0167700 | OS07G0675000 |
| OS04G0295200 | OS04G0455600 | OS04G0508800 | OS06G0232300 | OS06G0490400 | OS03G0815200 |
| OS02G0743500 | OS11G0518300 | OS11G0300600 | OS06G0261300 | OS04G0457000 | OS01G0591300 |
| OS07G0181500 | OS07G0486100 | OS01G0145200 | OS06G0233000 | OS12G0620100 | OS10G0363300 |
| OS05G0144200 | OS06G0122800 | OS08G0335500 | OS03G0728800 | OS09G0569700 | OS01G0786000 |
| OS06G0634700 | OS01G0917500 | OS01G0513400 | OS09G0129400 | OS02G0666000 | OS06G0531751 |
| OS01G0283700 | OS06G0691600 | OS04G0175000 | OS04G0218900 | OS04G0107600 | OS05G0238200 |
| OS04G0194000 | OS02G0650500 | OS02G0771500 | OS07G0468100 | OS02G0714000 | OS12G0580600 |
| OS01G0380800 | OS09G0572150 | OS03G0800000 | OS08G0119900 | OS08G0509300 | OS04G0450300 |
| OS01G0517900 | OS07G0581550 | OS10G0102900 | OS02G0471500 | OS03G0591700 | OS01G0870201 |
| OS01G0881966 | OS04G0499300 | OS10G0565100 | OS11G0149300 | OS08G0240500 | OS10G0570700 |
| OS04G0498000 | OS10G0573100 | OS02G0202300 | OS09G0373100 | OS09G0430600 | OS01G0253600 |
| OS03G0344900 | OS10G0531300 | OS03G0231400 | OS08G0443600 | OS11G0644100 | OS01G0851100 |
| OS02G0816900 | OS02G0787600 | OS02G0708600 | OS10G0515400 | OS04G0504700 | OS01G0799500 |
| OS05G0164900 | OS06G0474600 | OS04G0528100 | OS03G0672300 | OS08G0541400 | OS05G0411150 |
| OS09G0338500 | OS08G0431700 | OS04G0639300 | OS08G0119300 | OS05G0125600 | OS03G0167500 |
| OS03G0705433 | OS06G0267600 | OS10G0471300 | OS03G0180000 | OS08G0480100 | OS11G0616700 |
| OS09G0488750 | OS06G0665800 | OS01G0276900 | OS02G0100250 | OS11G0608000 | OS08G0207401 |
| OS02G0738350 | OS03G0850400 | OS07G0506000 | OS11G0658900 | OS12G0168000 | OS04G0682600 |
| OS01G0919950 | OS09G0371300 | OS08G0154700 | OS07G0559100 | OS03G0111700 | OS01G0919150 |
| OS02G0609500 | OS02G0135250 | OS10G0422566 | OS06G0204700 | OS05G0452151 | OS03G0795300 |
| OS01G0780500 | OS04G0198733 | OS06G0653800 | OS08G0104400 | OS03G0148300 | OS09G0487500 |
| OS02G0792600 | OS12G0107600 | OS09G0453700 | OS01G0188400 | OS09G0464350 | OS10G0401000 |
| OS03G0697466 | OS10G0550775 | OS01G0151700 | OS06G0671800 | OS04G0224200 | OS07G0545500 |
| OS02G0200800 | OS04G0463300 | OS06G0701300 | OS09G0428750 | OS07G0692600 | OS03G0784600 |
| OS03G0397500 | OS10G0390900 | OS01G0135600 | OS01G0615300 | OS06G0714000 | OS01G0837350 |
| OS03G0112600 | OS02G0596100 | OS06G0328200 | OS05G0390500 | OS08G0471000 | OS07G0113000 |
| OS03G0421800 | OS01G0682200 | OS08G0341700 | OS03G0418800 | OS01G0183300 | OS03G0857200 |
| OS01G0301300 | OS02G0630000 | OS09G0455300 | OS03G0839900 | OS11G0441900 | OS09G0529300 |
| OS05G0394301 | OS06G0199800 | OS06G0514700 | OS12G0453500 | OS08G0386125 | OS05G0554500 |
| OS02G0562300 | OS08G0560000 | OS09G0492700 | OS02G0564400 | OS03G0121300 | OS12G0137600 |
| OS03G0213400 | OS10G0474900 | OS06G0705100 | OS12G0458900 | OS12G0443800 | OS12G0498300 |
| OS01G0763600 | OS02G0112600 | OS12G0238400 | OS04G0675500 | OS12G0133850 | OS05G0194000 |
| OS02G0685350 | OS01G0917100 | OS11G0546300 | OS10G0412800 | OS06G0665500 | OS04G0468600 |
| OS08G0208700 | OS06G0695001 | OS01G0295900 | OS10G0561900 | OS02G0762800 | OS09G0498800 |
| OS07G0248800 | OS01G0267600 | OS08G0280200 | OS10G0484400 | OS02G0614800 | OS02G0188600 |
| OS06G0314100 | OS06G0708400 | OS07G0173400 | OS01G0173000 | OS05G0586200 | OS08G0352400 |
| OS06G0242000 | OS10G0155700 | OS04G0189800 | OS05G0440250 | OS07G0513600 | OS10G0503600 |
| OS05G0524100 | OS04G0583800 | OS01G0210200 | OS04G0479000 | OS12G0614600 | OS11G0163800 |
| OS12G0148400 | OS03G0713400 | OS02G0832150 | OS07G0475400 | OS03G0268250 | OS05G0149000 |

|              |              |              |              |              |              |
|--------------|--------------|--------------|--------------|--------------|--------------|
| OS06G0652000 | OS03G0245500 | OS04G0504500 | OS10G0539900 | OS07G0681500 | OS04G0177500 |
| OS06G0682850 | OS05G0100008 | OS03G0325500 | OS08G0226400 | OS02G0463401 | OS10G0547000 |
| OS02G0788800 | OS01G0273200 | OS03G0301500 | OS03G0755000 | OS01G0663800 | OS01G0534800 |
| OS11G0682600 | OS05G0153132 | OS04G0404400 | OS03G0412850 | OS05G0586500 | OS01G0619000 |
| OS05G0143500 | OS05G0396700 | OS03G0286800 | OS05G0509500 | OS01G0693700 | OS01G0808100 |
| OS01G0703300 | OS04G0663200 | OS01G0229000 | OS07G0113600 | OS11G0168500 | OS01G0609300 |
| OS08G0446700 | OS11G0245650 | OS12G0256900 | OS11G0346016 | OS08G0195900 | OS10G0346600 |
| OS04G0620000 | OS09G0252000 | OS10G0100500 | OS12G0622500 | OS10G0417800 | OS01G0920200 |
| OS09G0442800 | OS11G0184900 | OS02G0755000 | OS08G0194501 | OS04G0350300 | OS12G0545400 |
| OS08G0530033 | OS02G0217600 | OS07G0204000 | OS07G0666750 | OS10G0462300 | OS12G0172400 |
| OS01G0570601 | OS06G0609800 | OS08G0558400 | OS11G0578066 | OS02G0607100 | OS01G0915400 |
| OS03G0593200 | OS03G0422600 | OS10G0517050 | OS06G0118301 | OS08G0108925 | OS10G0381601 |
| OS02G0832301 | OS01G0934300 | OS08G0250100 | OS04G0627400 | OS09G0250800 | OS04G0154000 |
| OS08G0425100 | OS05G0589000 | OS02G0299000 | OS02G0829100 | OS08G0326300 | OS08G0353700 |
| OS05G0269100 | OS01G0757500 | OS07G0124000 | OS03G0742900 | OS06G0716467 | OS02G0117400 |
| OS02G0624350 | OS06G0325500 | OS03G0757900 | OS09G0460000 | OS07G0476401 | OS11G0522900 |
| OS08G0152300 | OS12G0591300 | OS02G0569400 | OS11G0552100 | OS11G0110033 | OS03G0152800 |
| OS08G0178300 | OS09G0441600 | OS02G0112600 | OS01G0928200 | OS06G0133500 | OS05G0593200 |
| OS05G0110600 | OS04G0480700 | OS04G0633400 | OS11G0296001 | OS03G0603500 | OS11G0654000 |
| OS03G0102366 | OS06G0257600 | OS10G0135100 | OS04G0589200 | OS10G0580200 | OS02G0658400 |
| OS08G0562700 | OS02G0807800 | OS05G0141400 | OS03G0826600 | OS06G0602400 | OS01G0631700 |
| OS07G0457500 | OS07G0694300 | OS02G0593700 | OS03G0603100 | OS04G0630500 | OS11G0707100 |
| OS01G0312600 | OS08G0296600 | OS10G0189100 | OS12G0507700 | OS01G0659800 | OS10G0517500 |
| OS02G0101800 | OS05G0157300 | OS11G0226400 | OS04G0105200 | OS02G0470100 | OS07G0578700 |
| OS06G0115600 | OS11G0695000 | OS08G0465400 | OS03G0142800 | OS07G0491600 | OS07G0200000 |
| OS03G0210100 | OS03G0825700 | OS05G0564601 | OS06G0314600 | OS01G0864500 | OS06G0287200 |
| OS05G0388400 | OS09G0462875 | OS04G0688000 | OS06G0102100 | OS11G0572800 | OS01G0134700 |
| OS08G0100800 | OS01G0199400 | OS01G0390300 | OS01G0977600 | OS04G0677100 | OS01G0371300 |
| OS08G0520900 | OS05G0528600 | OS07G0574500 | OS03G0206750 | OS05G0363951 | OS01G0555200 |
| OS04G0608500 | OS10G0485100 | OS08G0153750 | OS06G0660400 | OS04G0507700 | OS01G0823400 |
| OS06G0318400 | OS09G0469400 | OS04G0209450 | OS08G0518100 | OS07G0245100 | OS12G0153700 |
| OS06G0237800 | OS02G0595200 | OS10G0560451 | OS10G0420332 | OS07G0167700 | OS02G0624300 |
| OS03G0135300 | OS11G0231600 | OS05G0486100 | OS04G0463600 | OS04G0589900 | OS08G0322550 |
| OS01G0793500 | OS09G0306632 | OS03G0330200 | OS06G0495500 | OS06G0695900 | OS01G0258600 |
| OS07G0496401 | OS04G0503550 | OS09G0393200 | OS07G0657900 | OS01G0237200 | OS02G0629600 |
| OS01G0736500 | OS02G0727500 | OS06G0545601 | OS05G0213900 | OS05G0202200 | OS06G0298100 |
| OS10G0460000 | OS11G0550900 | OS01G0246601 | OS03G0165300 | OS01G0544450 | OS09G0444500 |
| OS05G0460200 | OS03G0232600 | OS07G0448100 | OS02G0527500 | OS12G0620400 | OS08G0492100 |
| OS03G0315400 | OS09G0457532 | OS03G0270800 | OS11G0233201 | OS03G0396900 | OS03G0166600 |
| OS07G0114500 | OS02G0814200 | OS08G0478100 | OS09G0545100 | OS01G0844000 | OS03G0731800 |
| OS07G0300100 | OS03G0645200 | OS09G0545250 | OS04G0410600 | OS02G0794300 | OS03G0321100 |
| OS03G0816300 | OS04G0398300 | OS01G0182300 | OS01G0735450 | OS04G0421800 |              |
| OS08G0276400 | OS06G0296900 | OS08G0559300 | OS07G0123533 | OS05G0150800 |              |
